# Supplementary material for: FASTory digital twin data
Source: PubMed Central journal article supplement — Data Brief. 2021 Feb 26;35:106912. doi: 10.1016/j.dib.2021.106912 (PMC7937978; doi:10.1016/j.dib.2021.106912), 2021-02-26
Supplement: mmc1.pdf [file mmc1.pdf]

## Wael Mohammed (TAU)

---

**From:** em.kais.3916.70eed6.1091e33a@editorialmanager.com on behalf of Xindong Wu  
<em@editorialmanager.com>  
**Sent:** keskiviikko 27. tammikuuta 2021 9.24  
**To:** Wael Mohammed (TAU)  
**Subject:** KAIS Regular Paper KAIS-D-17-00737R2: Acceptance and Final Manuscript - [EMID:c3202b4868805d7b]

CC: "Borja Ramis Ferrer" ramis@ieee.org, "Mussawar Ahmad" mussawar.ahmad@warwick.ac.uk, "Sergii Iarovyi" sergii.iarovyi@kalmarglobal.com, "Jiayi Zhang" jiayi.zhang@warwick.ac.uk, "Robert Harrison" robert.harrison@warwick.ac.uk, "Jose Luis Martinez Lastra" jose.martinezlastra@tuni.fi

Dear Mr. Mohammed,

"Comparing ontologies and databases: a critical review of lifecycle engineering models in manufacturing"  
by Borja Ramis Ferrer; Wael M. Mohammed; Mussawar Ahmad; Sergii Iarovyi; Jiayi Zhang; Robert Harrison; Jose Luis Martinez Lastra

Received: 20 Dec 2017

Revised: 14 Jan 2021

Accepted: 27 Jan 2021

(Note: These dates should be provided in the final manuscript, and the author(s) are not allowed to change them.)

I am pleased to inform you that the above revised paper has been accepted as a Regular Paper for publication in the Knowledge and Information Systems(KAIS) journal.

Please follow the instructions for final manuscript preparation on the journal home page <http://kais.bigke.org/>. Please do not make any deletions to your article and submit the following items \*within 5 weeks\*.

Kindly upload the final version of your manuscript as a revised submission so that it can be submitted to the editorial office and released to production.

Editorial Manuscript Number: KAIS-D-17-00737R2

You should (a) Upload the source files in a compressed file format (use a zip archive or any other archiving software) using the item type 'Supplementary material' (b) upload the PDF (or PS) file of the final paper using the item type 'Manuscript'.

COLOR FIGURES: The journal is printed in black and white by default. If you have color figures in your paper, you should either make sure that they are readable when printed in black and white, or ask for color reproduction when submitting your final manuscript by indicating that you are agreeing to pay the charges for color in the final version (see [http://www.springeronline.com/sgw/cda/frontpage/0,11855,4-152-70-1136715-detailsPage%253DcontentItemPage%2526contentItemId%253D148346%2526CIPageCounter%253DCI\\_FOR\\_AUTHORS\\_AND\\_EDITORS\\_PAGE6,00.html#anchor6](http://www.springeronline.com/sgw/cda/frontpage/0,11855,4-152-70-1136715-detailsPage%253DcontentItemPage%2526contentItemId%253D148346%2526CIPageCounter%253DCI_FOR_AUTHORS_AND_EDITORS_PAGE6,00.html#anchor6) for details).

If you cannot provide LaTeX files for your final manuscript submission, Springer also accepts Microsoft Word documents with no typesetting charge.

\* For Regular Papers Only: A passport-size photo of each author

If you have included photos in the above zip-archive submission, and the photos are in the provided PDF (or PS) file, Springer does not need a hardcopy of your photos.

I congratulate you on acceptance of your manuscript for publication as a regular paper and look forward to receiving the above mentioned publication material.

If your library has not subscribed to the KAIS journal, Springer and I would strongly encourage you to contact your librarian (or other relevant people) for a subscription. The subscription form is available on the journal home page (at <http://kais.bigke.org/>). Please note that a subscription to the journal automatically includes online access to the electronic version of the journal at <http://link.springer.de/link/service/journals/10115/index.htm>, in addition to the printed version.

Sincerely,

Xindong Wu  
Editor-in-Chief  
Knowledge and Information Systems

Comments for the Author:

Reviewer #2: This is a second review, and according to my first review the paper needed only minor revisions to begin with.

So I vote "Accept as is".

Note to the authors: There was no need to drop the word "existent" in the abstract -- it was just misspelled as "existant" with an 'a' in your first version.

**\*\*Our flexible approach during the COVID-19 pandemic\*\***

If you need more time at any stage of the peer-review process, please do let us know. While our systems will continue to remind you of the original timelines, we aim to be as flexible as possible during the current pandemic.

This letter contains confidential information, is for your own use, and should not be forwarded to third parties.

Recipients of this email are registered users within the Editorial Manager database for this journal. We will keep your information on file to use in the process of submitting, evaluating and publishing a manuscript. For more information on how we use your personal details please see our privacy policy at <https://www.springernature.com/production-privacy-policy>. If you no longer wish to receive messages from this journal or you have questions regarding database management, please contact the Publication Office at the link below.

---

In compliance with data protection regulations, you may request that we remove your personal registration details at any time. (Use the following URL: <https://www.editorialmanager.com/kais/login.asp?a=r>). Please contact the publication office if you have any questions.
